# Supplementary material
Source: publisher site journal article supplement (https://www.dovepress.com/article/481649)
Supplement: Supplementary file 1 [file get_supplementary_file.php]

**Supplementary Table 1** The variance inflation factor (VIF) assessed multicollinearity. A value > 5 indicates potential multicollinearity.

| Variable | VIF |
| --- | --- |
| NEU | 7.8786 |
| RBC | 3.0056 |
| MON | 10.073 |
| RDWSD | 1.153 |
| PLT | 3.0774 |
| HGB | 3.0616 |
| HDLC | 1.0769 |
| LYM | 8.1835 |
| LMR | 11.495 |
| NMR | 11.173 |
| SII | 9.5827 |

**Supplementary Table 2** Calibration degree evaluated by the Hosmer–Lemeshow test. P < 0.05: difference between the predicted and observed values, average calibration. P > 0.05: no significant difference, good fit.

| Goodness of Fit Test | Chi-square | degrees of freedom | P-value |
| --- | --- | --- | --- |
| Training set | 14.324 | 8 | 0.074 |
| Validation set | 10.955 | 8 | 0.204 |


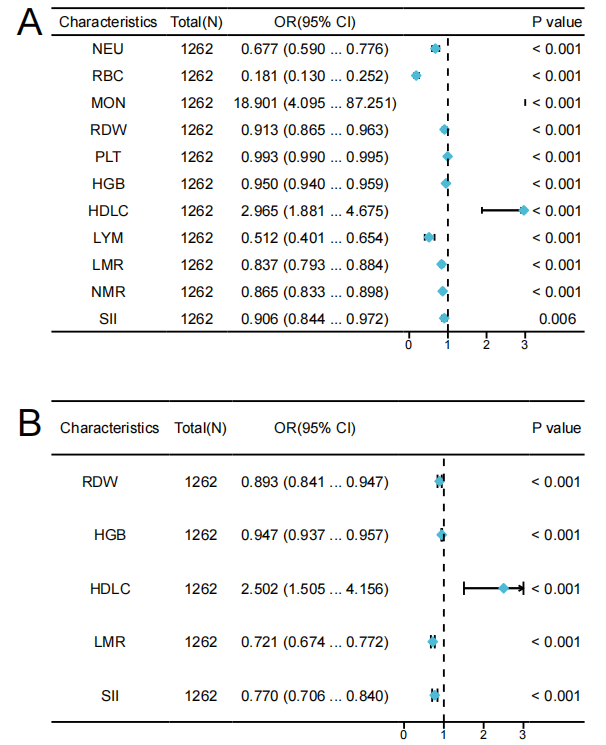


**Supplementary Figure 1** Forest plots of risk factors for MS with single factor independent prognosis (A) and multifactor independent prognosis (B).

**Abbreviations:** NEU, neutrophil; RBC, red blood cell; MON, monocyte; RDW, red blood cell distribution width; PLT, platelet; HGB, hemoglobin; HDLC, high-density lipoprotein cholesterol; LYM, monocyte-to lymphocyte ratio; LMR, lymphocyte-to-monocyte ratio NMR, neutrophil-to-monocyte ratio; SII, systemic immune‐inflammation index; OR, odds ratio.


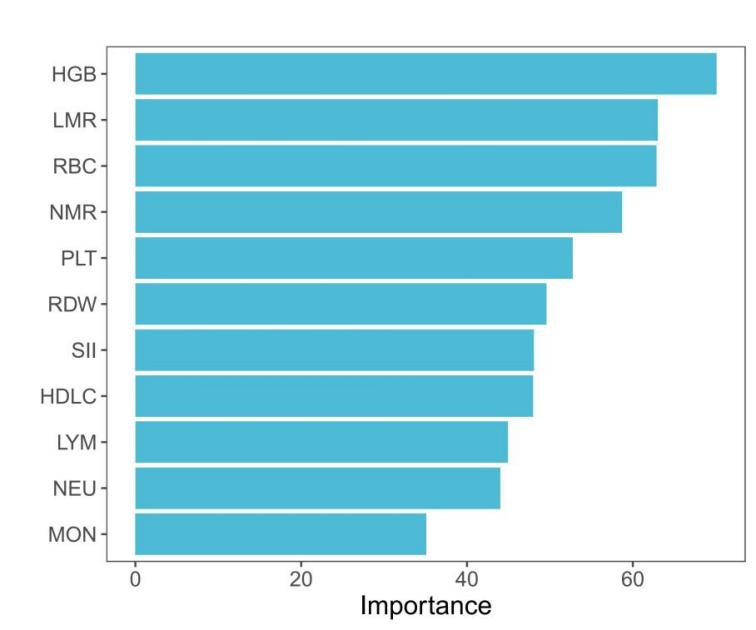


**Supplementary Figure 2** Importance of features from the random forest model.

**Abbreviations:** HGB, hemoglobin; LMR, lymphocyte-to-monocyte ratio; RBC, red blood cell; NMR, neutrophil-to-monocyte ratio; PLT, platelet; RDW, red blood cell distribution width; SII, systemic immune‐inflammation index; HDLC, high-density lipoprotein cholesterol; LYM, monocyte-to lymphocyte ratio; NEU, neutrophil; MON, monocyte.


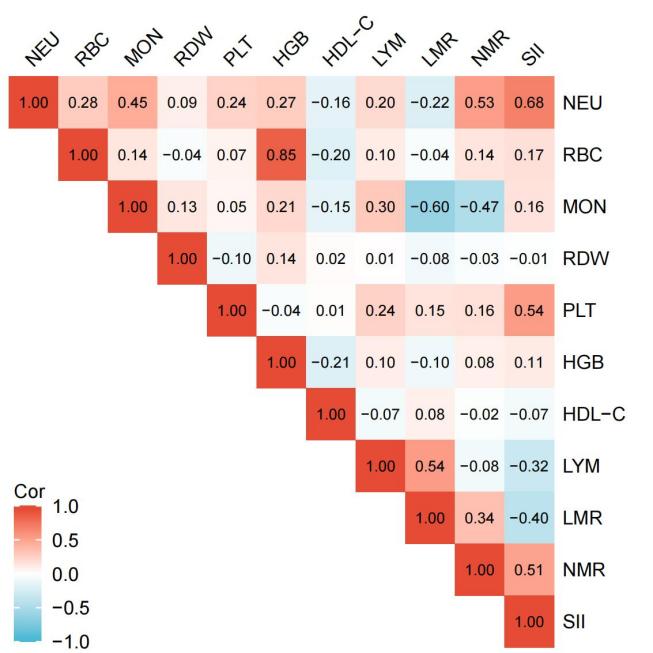


**Supplementary Figure 3** Heatmap of pairwise correlation coefficients among variables in the dataset.

**Abbreviations:** NEU, neutrophil; RBC, red blood cell; MON, monocyte; RDW, red blood cell distribution width; PLT, platelet; HGB, hemoglobin; HDLC, high-density lipoprotein cholesterol; LYM, monocyte-to lymphocyte ratio; LMR, lymphocyte-to-monocyte ratio; NMR, neutrophil-to-monocyte ratio; SII, systemic immune‐inflammation index.


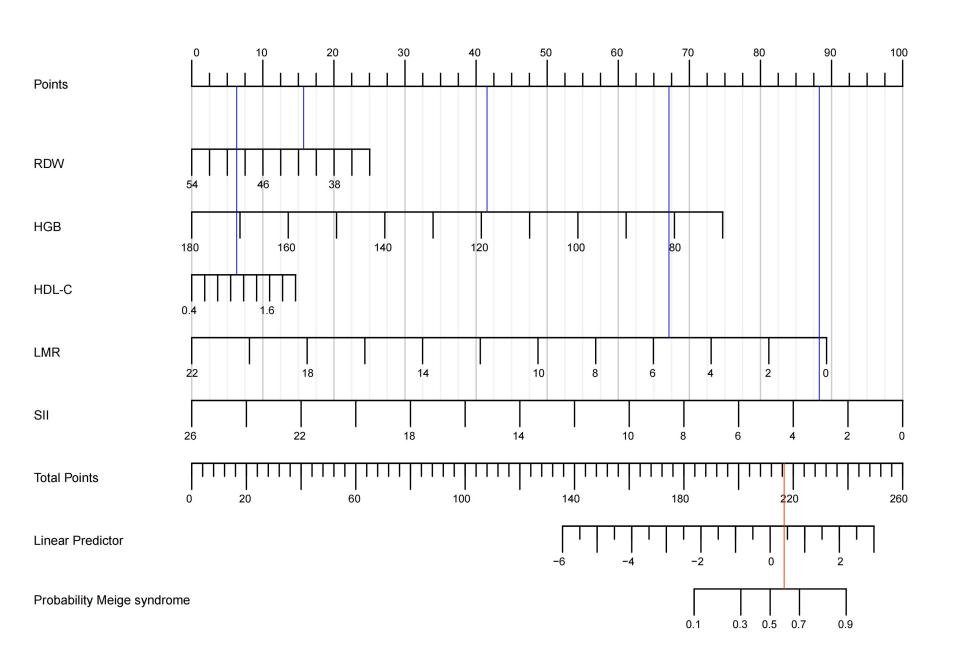


**Supplementary Figure 4** Example of the MS disease risk prediction.

The blue lines represent values of a randomly selected patient from the development dataset who is RDW of 41.4 (15.75 points), with HGB of 119 g/L (41.59 point), HDL-C of 1.11 g/L (6.36points), LMR of 5.58 (66.71 points) and SII of 3.22 (87.62 points). These values when plotted, correspond to the points scale and points are then summed to give a total point score. The presented patient has a total point’s score of 218.03.

**Abbreviations:** RDW, red blood cell distribution width; HGB, hemoglobin; HDL-C, high-density lipoprotein cholesterol; LMR, lymphocyte-to-monocyte2 ratio; SII, systemic immune‐inflammation index.

**
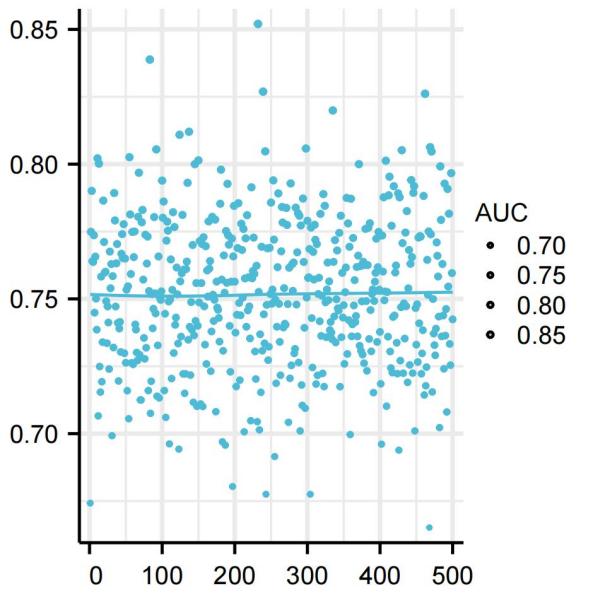
**

**Supplementary Figure 5** Model validation was conducted via Five-fold cross-validation, with the average AUC serving as the metric for assessment.

**Abbreviations:** AUC, Area Under Curve.
